# Supplementary material
Source: publisher figshare collection journal article supplement (https://karger.figshare.com/ndownloader/files/22746335)
Supplement: Supplementary file 1 [file 22746335]

**Supplementary table 1.**

Patient characteristics for plasma samples.

|  | **AAA** | **Controls** |
| --- | --- | --- |
| Number of patients | 140 | 37 |
| Age (SD) | 70 ± 4.0 | 70 ± 2.5 |
| Male (%) | 136 (97%) | 37 (100%) |
| Aortic diameter, mm (SD) | 41 ± 5.4 | < 30 |
| Statins (%) | 112 (80%) | 9 (24%) |
| CHD (%) | 58 (41%) | 5 (14%) |
| CVD (%) | 16 (11%) | 1 (3%) |
| Hypertension (%) | 115 (82%) | 18 (49%) |
| Hyperlipedemia (%) | 83 59%) | 7 (19%) |
| Renal dysfunction (%) | 14 (10%) | 2 (5%) |
| DM2 (%) | 23 (16%) | 7 (19%) |

AAA=abdominal aortic aneurysm, CHD=coronary heart disease, CVD=cardiovascular disease, DM2=diabetes mellitus type 2, SD=standard deviation.
